# Supplementary material
Source: PubMed Central journal article supplement (PMC7968376)
Supplement: NIHMS1677634-supplement-Supplementary_Material.pdf [file NIHMS1677634-supplement-Supplementary_Material.pdf]

Figure S1

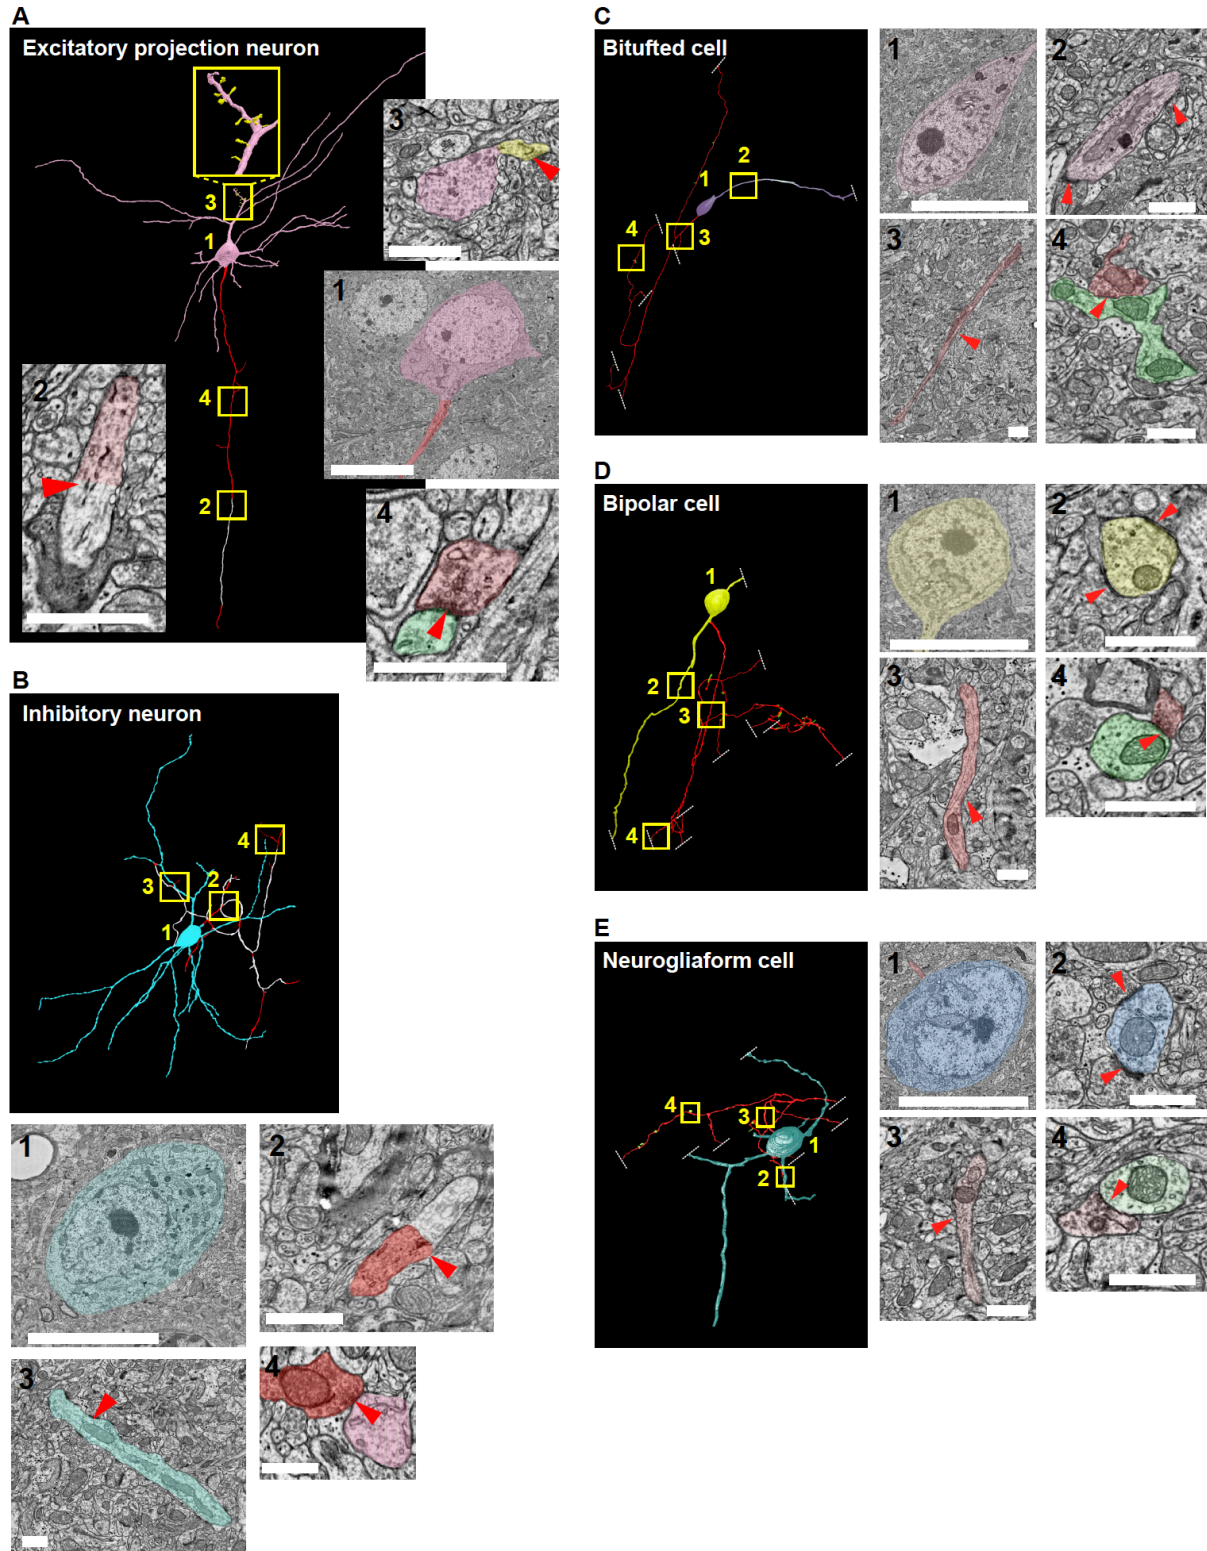

**Figure S1. Morphological characterization of an excitatory neuron and myelinated and non-myelinated interneurons in V1. Related to Figure 1.**

(A) Representative 3D rendering of a cortical pyramidal cell reconstructed from a high-resolution EM dataset of V1 cortex (Bock et al., 2011); soma and dendrites shown in pink, spines in yellow, non-myelinated axon in red, and myelin in white. EM images are representative single-section images of the pyramidal-shaped cell body (1), the descending myelinated axon (2), spiny dendrites (3), and an example of an asymmetrical excitatory synapse (4) (red arrowheads). (B) 3D reconstruction and EM images of a neuron with morphological features of a cortical interneuron, with soma and dendrites labeled in blue, non-myelinated axon in red, and myelin in white. EM images are representative single-section images of the ovoid shape cell body (1), ascending myelinating axon (2), spiny dendrites receiving multiple shaft synapses (red arrowhead), (3) and a symmetrical axo-dendritic synapse onto a pyramidal neuron (pink) (4) (Red arrowheads). Scale bars, 10 $\mu$ m for cell bodies, 1 $\mu$ m for axons and synapses. 3D reconstructions of three interneurons with morphological and synaptic connectivity profiles of a cortical bitufted cell (C), a bipolar cell (D), and a neurogliaform cell (E). Dashed white lines indicate the end of EM tracing due to the axon or dendrites leaving the V1 EM volume, or where the quality of the EM data precluded further tracing. Right, EM images are representative single sections of the cell bodies (1), dendrites (2), axons (3), and symmetrical synapses (red arrowhead) (4). Scale bars, 10 $\mu$ m for panels 1 and 1 $\mu$ m for panels 2-4.

Figure S2

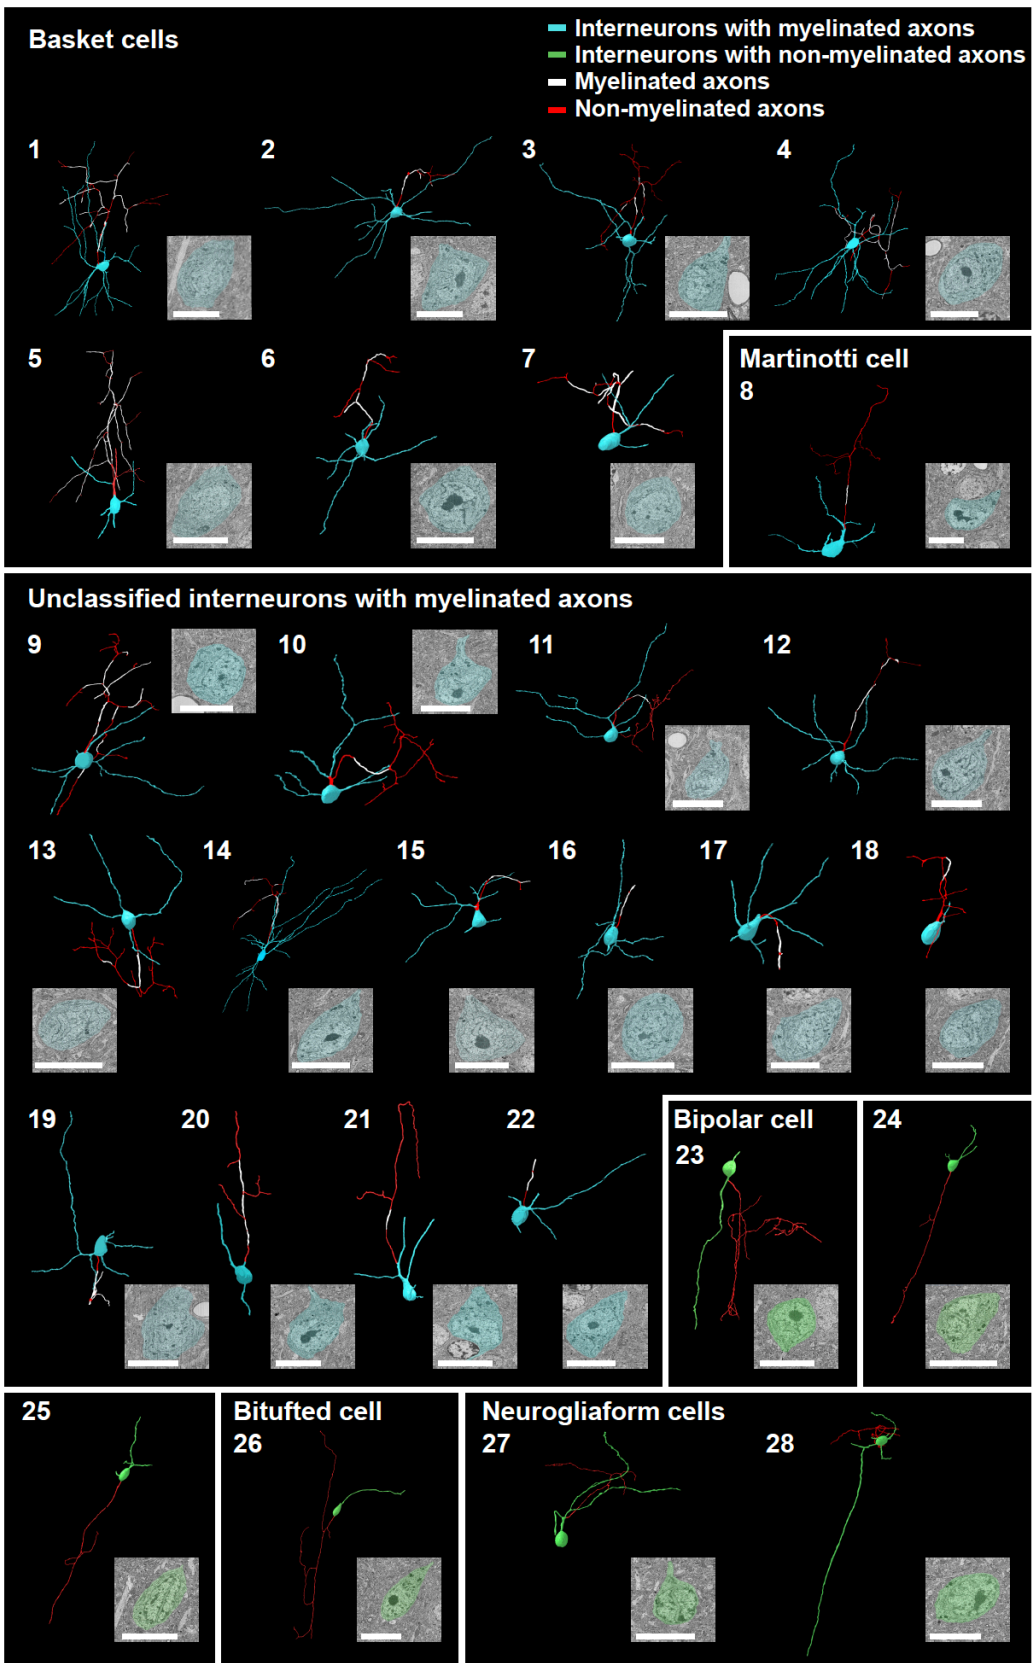

**Figure S2. Identification of cortical interneuron subtypes in layer II/III of the V1 cortex.  
Related to Figure 1.**

3D reconstructions of 28 neurons with morphological and synaptic profiles of cortical interneurons traced from the high-resolution EM dataset of V1 cortex. Non-myelinated axons are shown in red, myelin in white, cell bodies and dendrites of interneurons with myelinated axons in blue, and cell bodies and dendrites of interneurons with non-myelinated axons in green. EM images of the cell body for each of the interneurons are displayed next to the 3D renderings. Scale bar 10 $\mu$ m. 12 of the interneurons were classified according to distinctive morphological and synaptic connectivity profiles (Petilla Interneuron Nomenclature Group et al., 2008) as basket cells (**1-7**), Martinotti cell (**8**), bipolar (**23**), bitufted (**26**), and neurogliaform cells (**27-28**) (see **Table S1**).

Figure S3

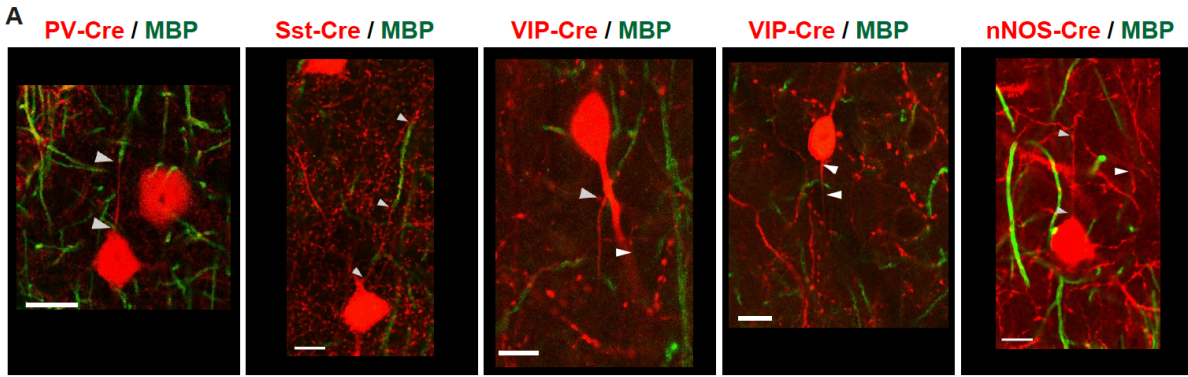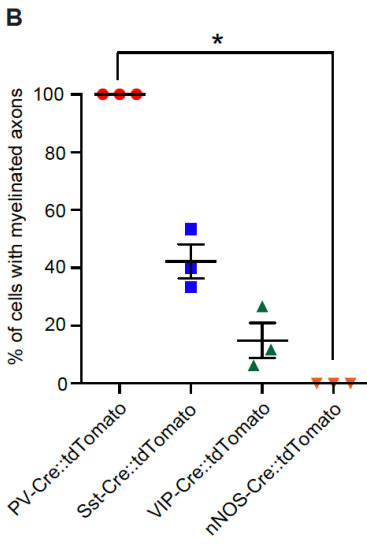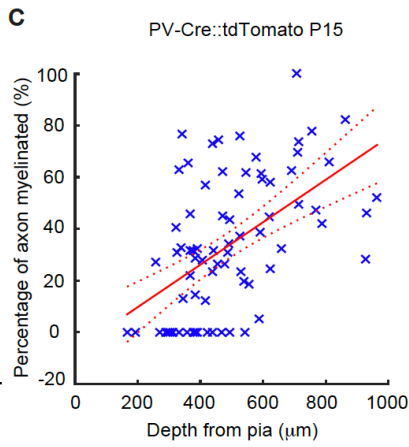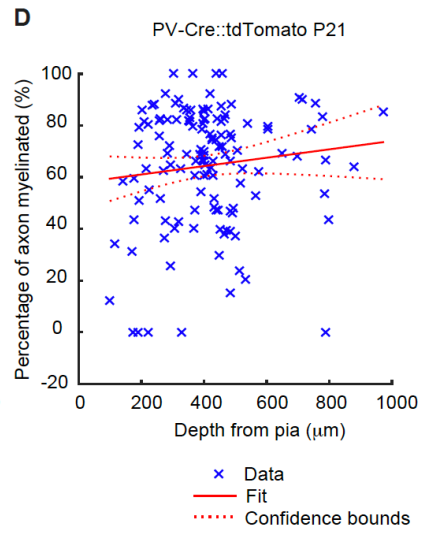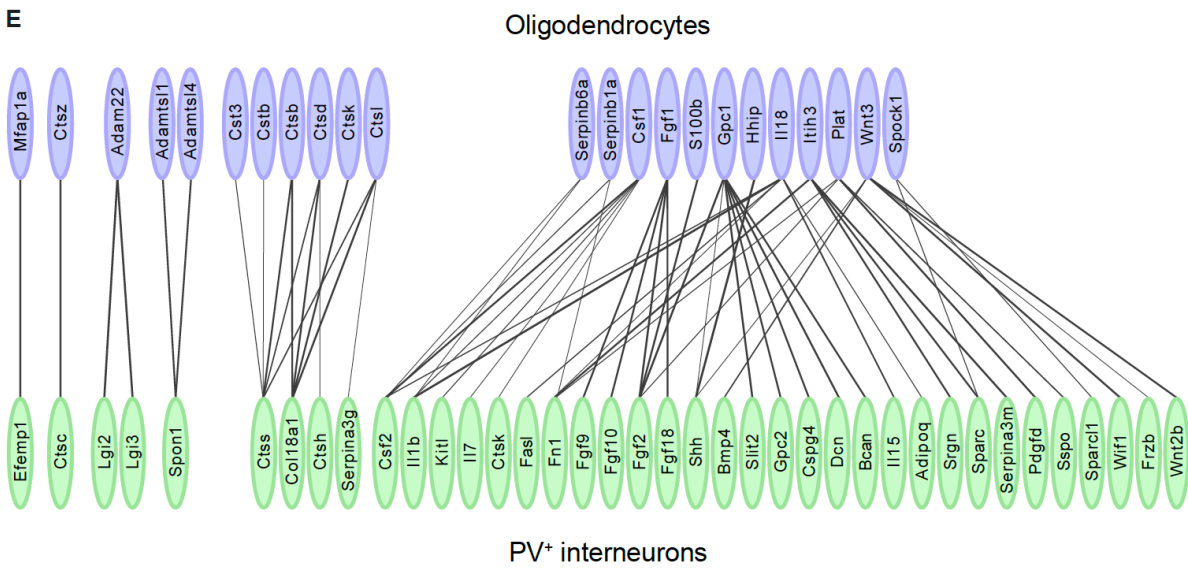

**Figure S3. Axonal myelination profiles of specific interneuron populations across cortical layers and candidate genes involved in PV<sup>+</sup> interneuron and oligodendrocyte interaction. Related to Figure 2.**

(A) Representative confocal images of neurons from the V1 of PV<sup>+</sup> (PV::tdTomato), Sst<sup>+</sup> (Sst::tdTomato), VIP<sup>+</sup> (Sst::tdTomato) and nNOS<sup>+</sup> (nNOS::tdTomato) animals at P60, labeled with anti-MBP (green) (See Video S1). White arrowheads indicate the axons and ends of myelin sheaths where visible. (B) Pooled data showing the percentage of PV<sup>+</sup>, Sst<sup>+</sup>/PV<sup>-</sup>, VIP<sup>+</sup> and nNOS<sup>+</sup> neurons with myelinated axons at P60 (n = 3 animals each). Data are presented as mean ± s.e.m. \**P* < 0.05 (Fisher's exact test). (C-D) Scatter plots of the percentage of axon length that is myelinated for all axons with myelin (excluding the initial axon segment, defined as the axon between the cell body and the edge of the first myelin sheath) from individually traced PV<sup>+</sup> (PV::tdTomato) cells located in the lower through upper layers of the V1 at P15 (C) and P21 (D). Linear regression fit, solid red line; 95% confidence intervals, red dotted lines (P15 n = 5 and *P* = 3.2262e-07; P21 n = 3 and *P* = 0.19443, by Spearman rank-order correlation). (E) A network interaction map of the PV<sup>+</sup> and oligodendrocyte partner genes constructed using Cytoscape (Shannon et al., 2003). The color intensity of the line connecting two nodes indicates the general strength of the interaction between that protein pair as computed by StringDB.

Figure S4

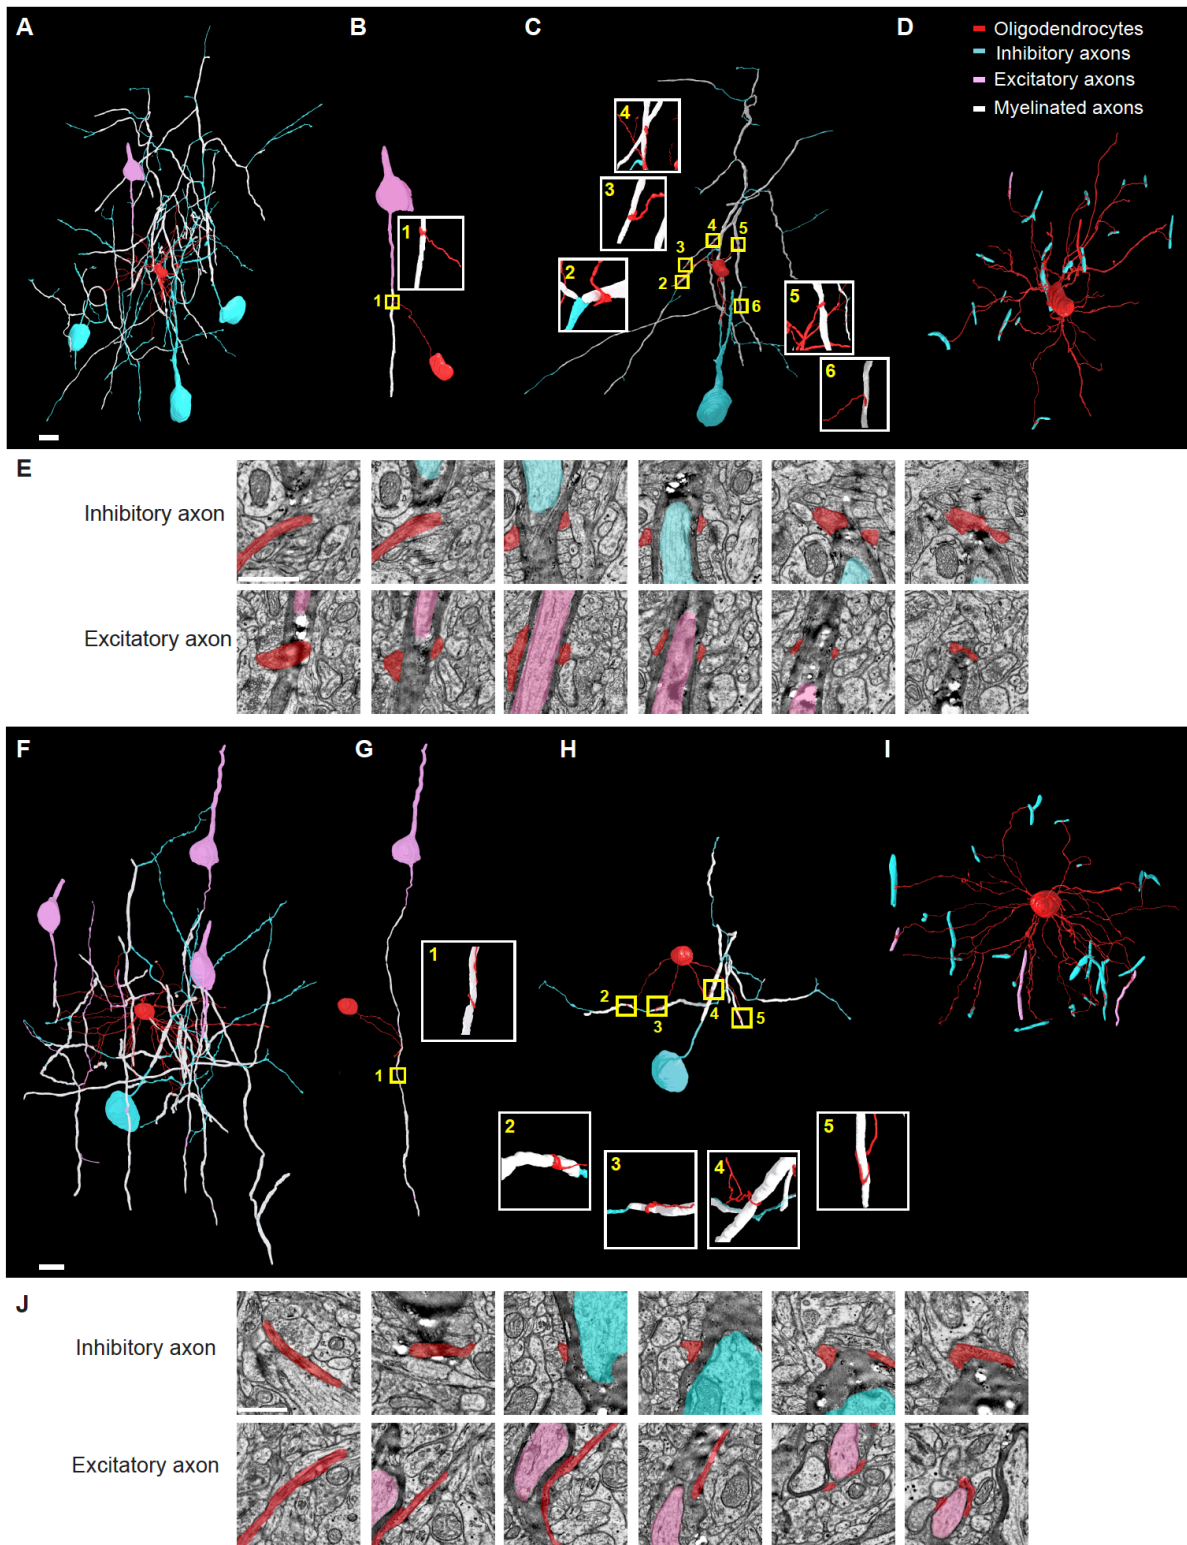

**Figure S4. Additional examples of individual cortical oligodendrocytes predominantly myelinating the axons of inhibitory and some excitatory neurons. Related to Figure 4 and Figure 5.**

**(A, F)** 3D renderings of oligodendrocytes **6** and **5** (**Figure 5A**) myelinating multiple inhibitory and excitatory axons. Scale bar 1 $\mu$ m. **(B, G)** 3D reconstruction of processes extending from oligodendrocyte 6 and 5 myelinating the axon of a pyramidal neuron. **(C, H)** Reconstructions of oligodendrocytes 6 and 5 repeatedly myelinating the axon of a single inhibitory neuron. **(D, I)** 3D reconstructions of the oligodendrocytes with all of the inhibitory myelinated axons labeled in blue and excitatory axons shown in pink. Scale bar 10 $\mu$ m. **(E, J)** Representative EM images of two branches (red) originating from oligodendrocytes 6 and 5 myelinating the axon of a single inhibitory neuron (blue) and an axon of a single excitatory neuron (pink). (**See Video S2**).



Figure S5

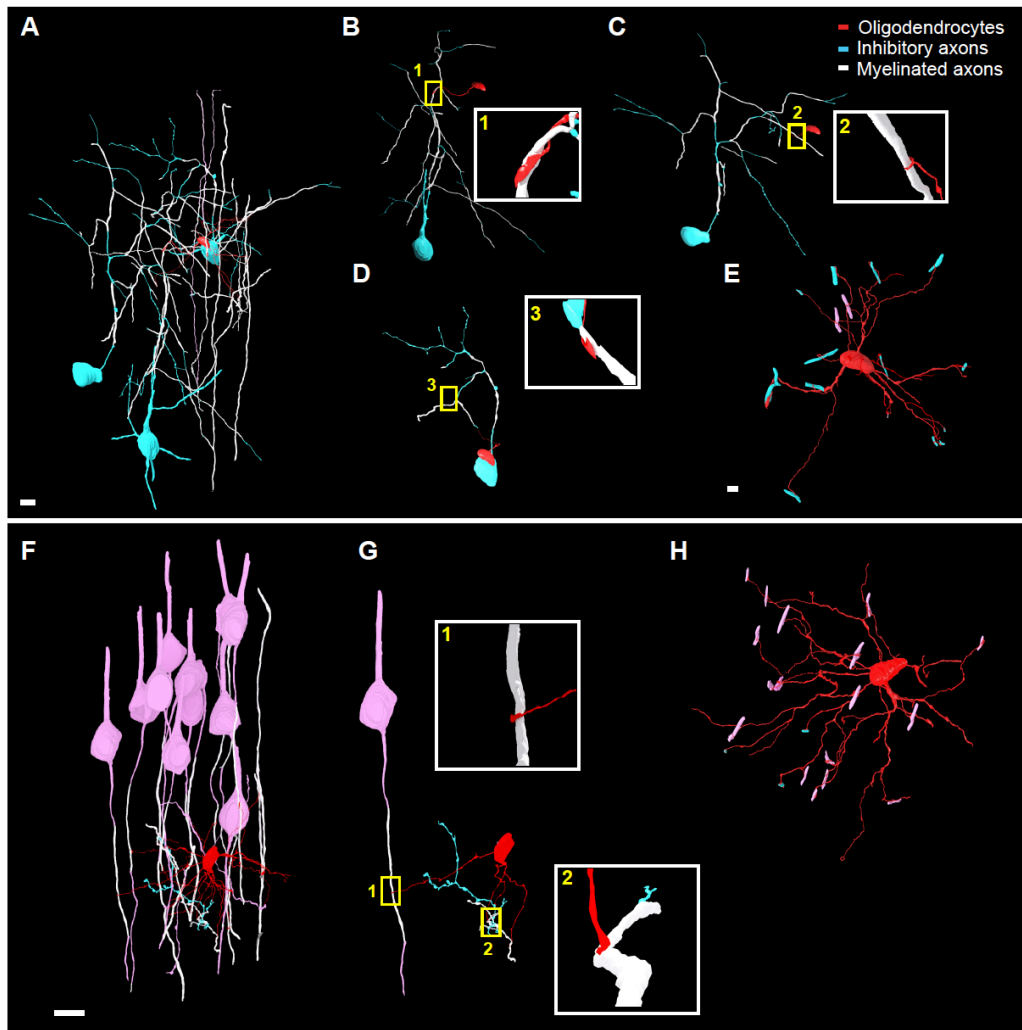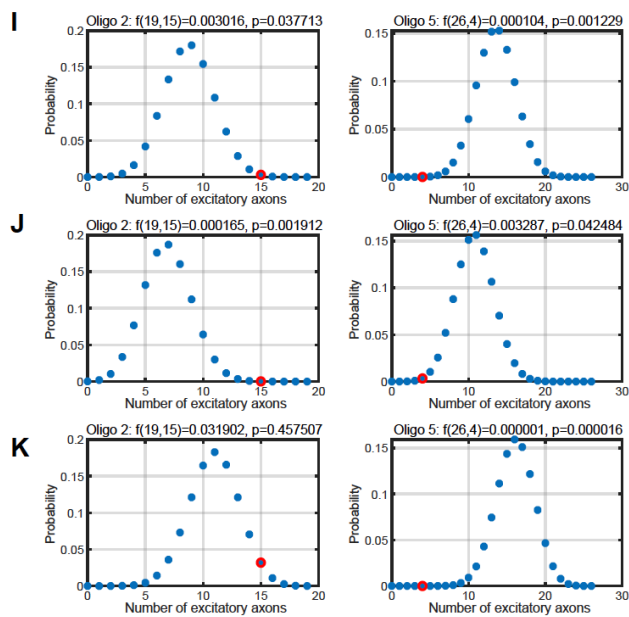

**Figure S5. Additional examples of oligodendrocytes predominantly myelinating either inhibitory or excitatory axons. Related to Figure 5.**

(A) 3D reconstructions of a single oligodendrocyte (Oligodendrocyte 3, **Figure 5A**) myelinating the axons of multiple inhibitory neurons. The oligodendrocyte and all branches are labeled in red, cell somata, dendrites and non-myelinated axons in blue, and myelinated axons in white. (B-D) Example 3D reconstructions of individual oligodendrocyte processes (red) myelinating the axons of these interneurons. (E) 3D reconstructions of oligodendrocyte 3 showing branches myelinating inhibitory axons (blue) and excitatory axons (pink). Scale bar 10 $\mu$ m. (F) 3D reconstruction of a single oligodendrocyte from layer II/III predominately myelinating the axons of excitatory neurons (Oligodendrocyte 1, **Figure 5A**). The oligodendrocyte is labeled in red; myelinated axons in white; inhibitory non-myelinated axons in blue; and excitatory non-myelinated axons in pink. (G) Yellow boxed regions correspond to the oligodendrocyte processes ensheathing the axons of inhibitory and excitatory axons enlarged at right. Image to the right shows the oligodendrocyte with only the axons of the single excitatory and inhibitory neurons shown in the enlargements, for clarity. (H) 3D reconstruction of the oligodendrocyte 1, showing the total number of branches myelinating excitatory axons (pink) and inhibitory axons (blue). Scale bar 10 $\mu$ m. (I-K) Binomial distribution plots for oligodendrocyte 2 and 5, comparing the actual number of myelinated excitatory axons (red circles) with the number expected from the average ratio of locally available, classifiable myelinated axons in this dataset (I, reproduced from **Figure 5D** for ease of comparison), or assuming extreme scenarios wherein the 20% of unidentifiable axons are exclusively inhibitory (J) or excitatory (K).

## Supplementary Tables and Legends

### **Table S1. Location of interneurons and oligodendrocytes traced in V1 EM dataset. Related to Figure 1 and Figure 4.**

Location of the cell bodies and synapses of 28 individually traced inhibitory neurons in the V1 EM dataset (Sheet1; **Figure 1A**). The location of the inhibitory axo-somatic synapses used to classify basket cells are highlighted in red. Location of the 10 oligodendrocytes and each of the axons myelinated in the V1 EM dataset (Sheet2; **Figure 4B**). [**separate Excel file**]

**PV-Cre::tdTomato**

| Age | Total number of cells traced | Number of cells with myelinated axons | Number of cells w/o myelinated axons | Percentage of cells with myelinated axons (%) |
|-----|------------------------------|---------------------------------------|--------------------------------------|-----------------------------------------------|
| P15 | 78                           | 58                                    | 20                                   | 74                                            |
| P21 | 131                          | 126                                   | 5                                    | 96                                            |
| P30 | 111                          | 111                                   | 0                                    | 100                                           |
| P60 | 156                          | 156                                   | 0                                    | 100                                           |

*P* values for indicated comparison

|            |           |
|------------|-----------|
| P15 vs P21 | 7.79E-06  |
| P15 vs P30 | 4.04E-09  |
| P15 vs P60 | 4.59E-11  |
| P21 vs P30 | <i>ns</i> |
| P21 vs P60 | 0.019     |
| P30 vs P60 | <i>ns</i> |

**Sst-Cre::tdTomato/PV<sup>-</sup>**

| Age | Total number of cells traced | Number of cells with myelinated axons | Number of cells w/o myelinated axons | Percentage of cells with myelinated axons (%) |
|-----|------------------------------|---------------------------------------|--------------------------------------|-----------------------------------------------|
| P15 | 52                           | 0                                     | 52                                   | 0                                             |
| P21 | 52                           | 10                                    | 42                                   | 19                                            |
| P30 | 36                           | 21                                    | 15                                   | 58                                            |
| P60 | 75                           | 39                                    | 36                                   | 52                                            |

*P* values for indicated comparison

|            |           |
|------------|-----------|
| P15 vs P21 | 0.0012    |
| P15 vs P30 | 5.59E-11  |
| P15 vs P60 | 5.07E-12  |
| P21 vs P30 | 2.43E-04  |
| P21 vs P60 | 2.00E-04  |
| P30 vs P60 | <i>ns</i> |

**PV-Cre::tdTomato vs. Sst::tdTomato PV<sup>-</sup>***P* values for indicated comparison

|            |          |
|------------|----------|
| P15 vs P15 | 3.74E-15 |
| P21 vs P21 | 1.54E-19 |
| P30 vs P30 | 2.62E-06 |
| P60 vs P60 | 9.81E-19 |

**Table S2. Percent myelination of PV<sup>+</sup> and Sst<sup>+</sup>/PV<sup>-</sup> interneurons. Related to Figure 2.**

Statistical analysis examining the effect of age (P15-P60) on the total number of PV<sup>+</sup> and Sst<sup>+</sup>/PV<sup>-</sup> interneurons with myelinated axons (**Figure 2C**).
